# Supplementary material
Source: PubMed Central journal article supplement (PMC4263689)

## Supplementary Figures

**Fig. S1. Expression of FoxP3 by (a) T-bet<sup>+</sup> or (b) RORγt<sup>+</sup> T cells in a low anti-CD3 (1 μg/ml) activation condition.** Cells were cultured for 5 days in a Th1 or Th17 condition with C2 (10 mM) or C3 (1 mM). Representative or pooled data from 3 experiments are shown.  
\*Significant differences from blank groups (no treatment) ( $P \leq 0.05$ ).

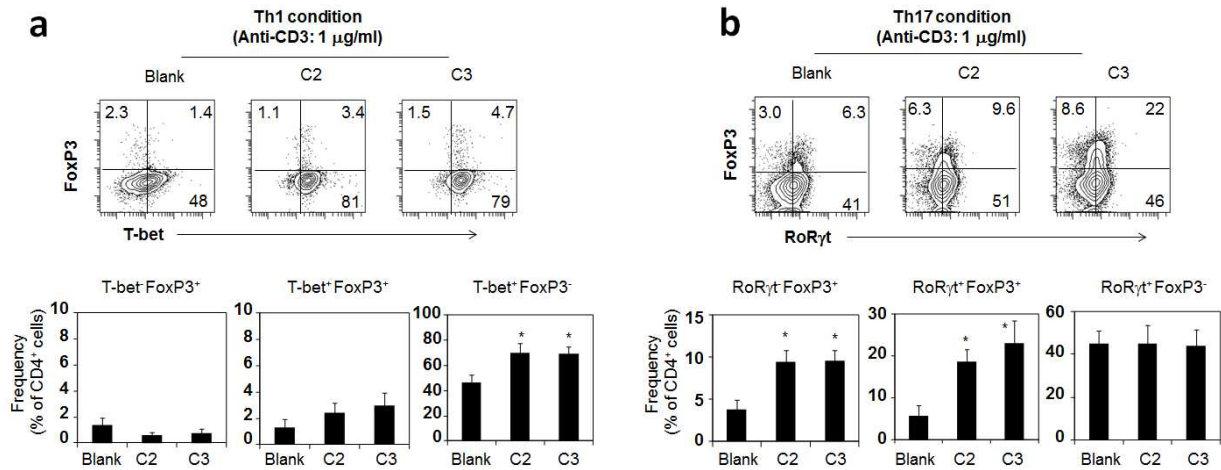

**Fig. S2. Few IL-10<sup>+</sup> T cells induced by SCFAs express FoxP3.** (a) Cells were activated with anti-CD3 (5  $\mu$ g/ml) for 5 days in a (a) Tnp, (b) Th1, or (c) Th17 polarization condition with C2 (10 mM) or C3 (1 mM). Cells were activated with anti-CD3 (5  $\mu$ g/ml unless indicated otherwise) and anti-CD28 for 5 days. Representative and pooled data from 3 experiments are shown. \*Significant differences from blank groups (no treatment) ( $P \leq 0.05$ ).

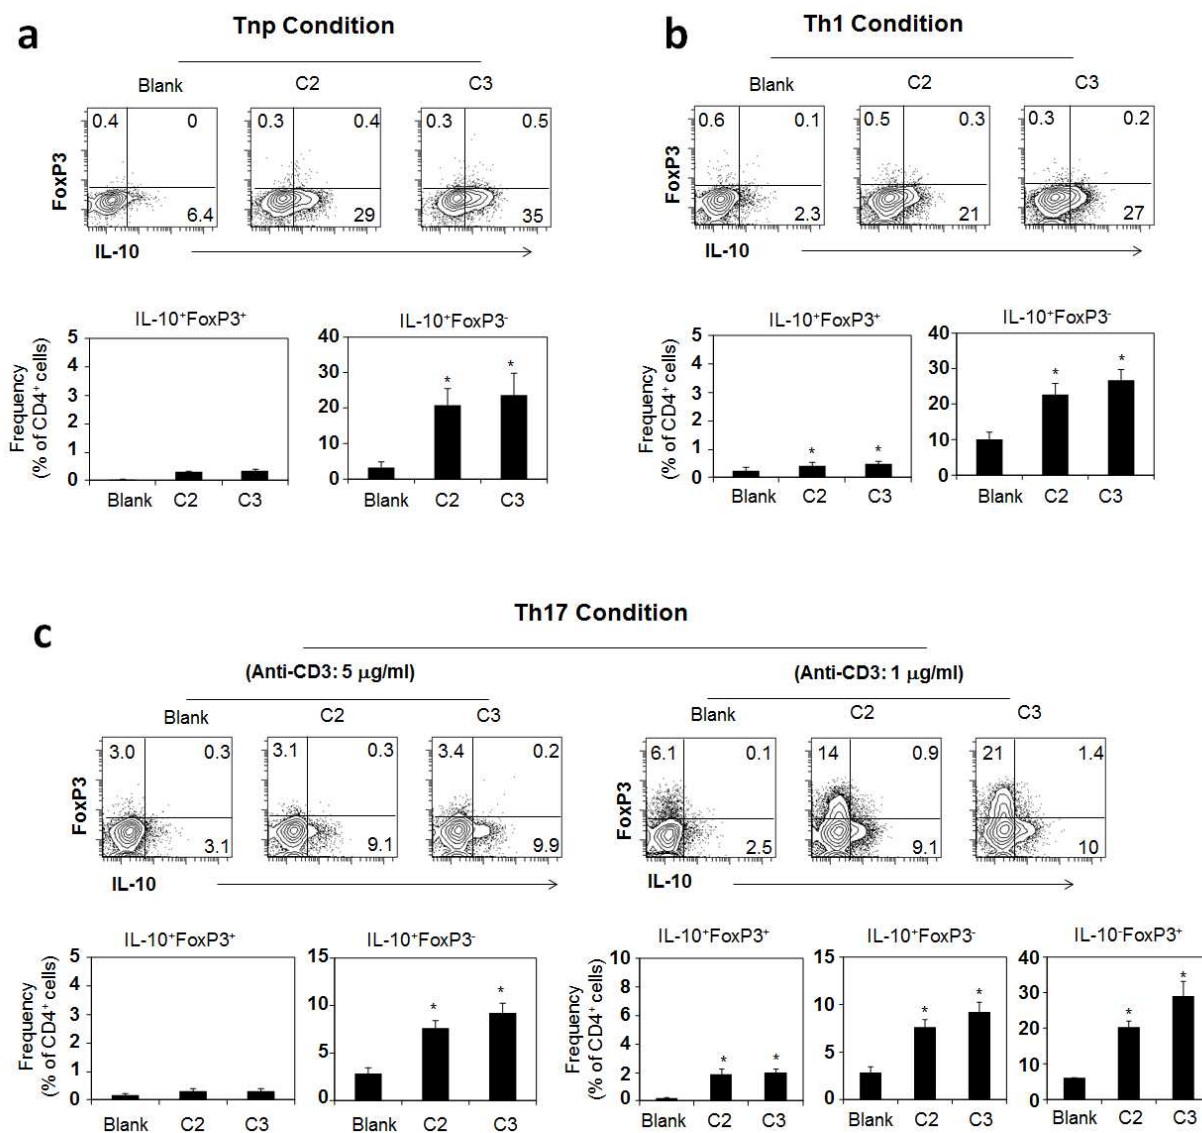

**Fig. S3. C2 increased IL-10-producing T cells in the steady condition but effector T cells in an infection condition.** Mice were fed with C2 for 6-8 weeks, and some mice were infected with *C. rodentium*. Changes in Th17, Th1, and IL-10<sup>+</sup> T cells in indicated tissues 14 days after oral infection with *C. rodentium* were examined by flow cytometry. Numbers of indicated CD4<sup>+</sup> T cell subsets in each organ are shown. \*Significant differences ( $P \leq 0.05$ ;  $n=7-9$ ).

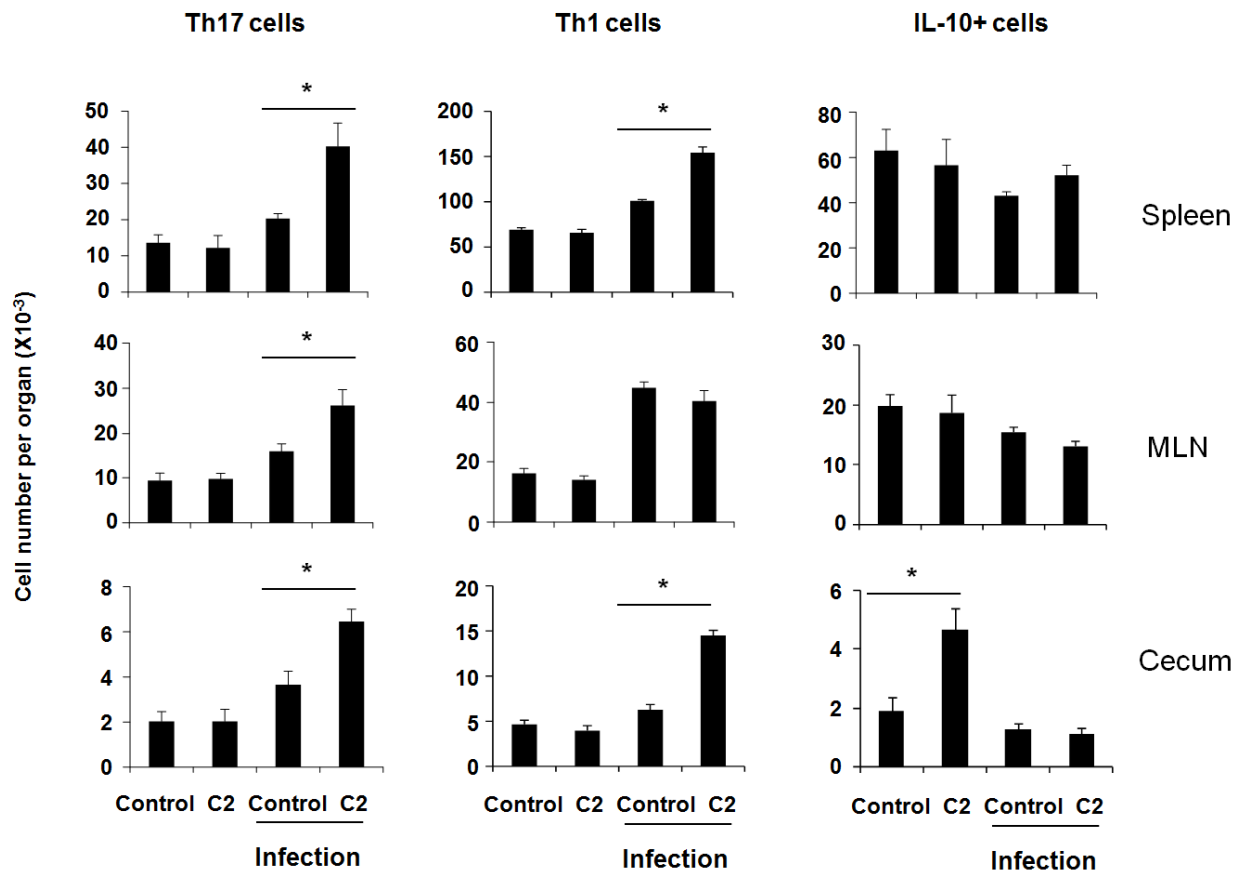

**Fig. S4. ERK activation in T cells was not affected by SCFAs.** Naïve CD4<sup>+</sup> T cells were activated for 1 or 3 hours with anti-CD3 (coated) and CD28 (soluble) in the presence of C2 or C3. Pooled data obtained from 3 experiments are shown in the graphs.

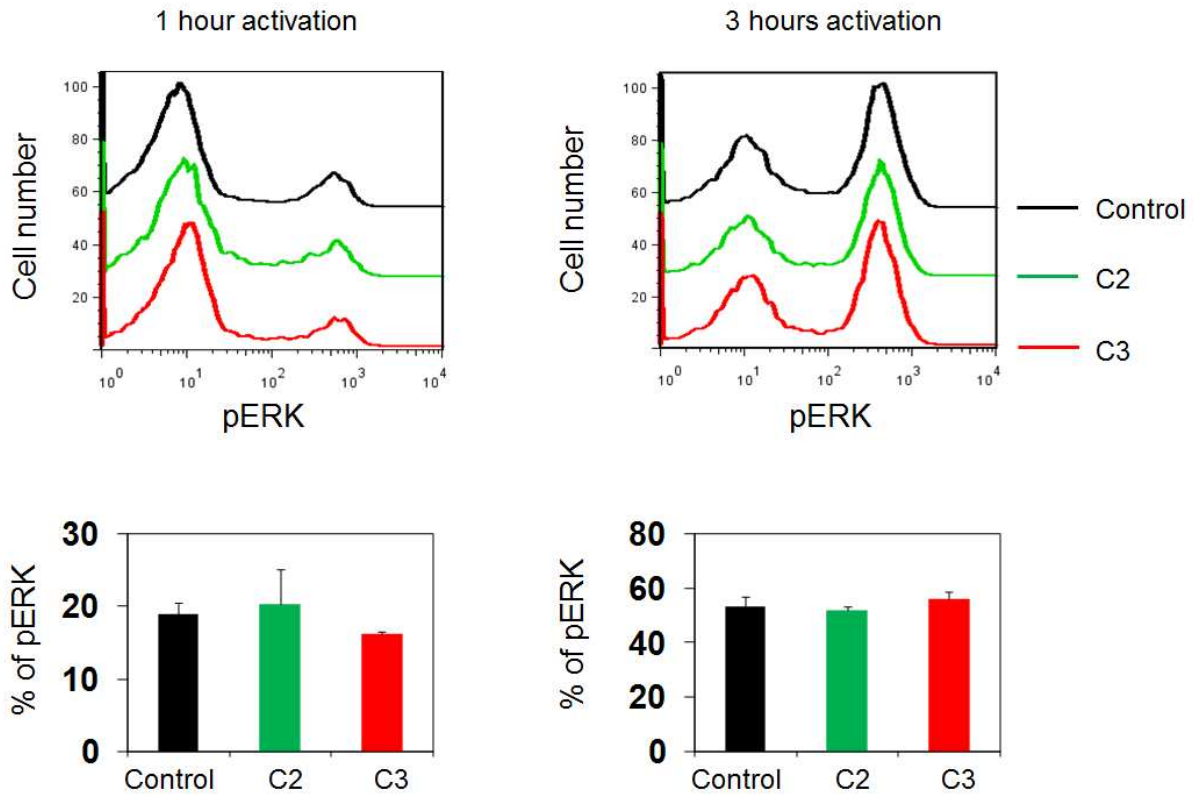

Supplement: NIHMS592085-supplement-01.pdf [file NIHMS592085-supplement-01.pdf]
